# Supplementary material
Source: PubMed Central journal article supplement (PMC3150876)
Supplement: 1104675108_pnas.201104675SI.pdf [file 1104675108_pnas.201104675SI.pdf]

# Supporting Information

DiPatrizio et al. 10.1073/pnas.1104675108

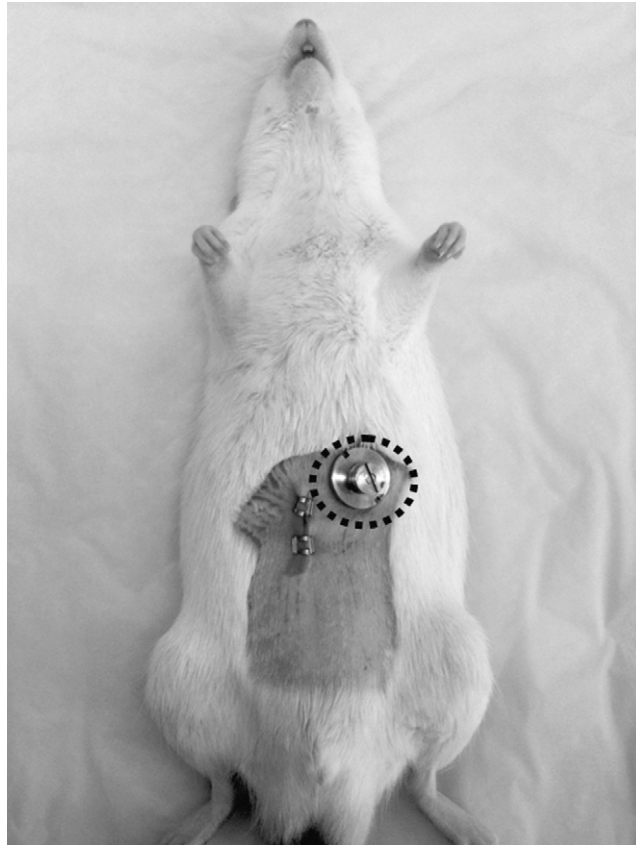

**Fig. S1.** Location of implanted gastric cannulae in the stomach. The dashed line indicates the borders of the stomach.

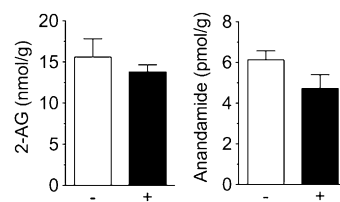

**Fig. S2.** Vagotomy blocks sham-fat induced mobilization of endocannabinoids in the rat jejunum. Effects of complete subdiaphragmatic vagotomy on levels of 2-AG (*Left*) and anandamide (*Right*) in the jejunum of rats sham feeding corn oil for 30 min. -, no diet presented; +, diet presented. Results are expressed as mean  $\pm$  SEM;  $n = 4-5$  per condition. Unpaired  $t$  tests, two-tailed, between no diet and diet condition.

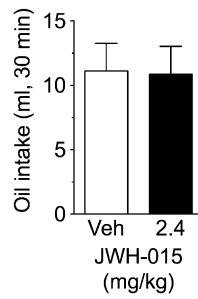

**Fig. S3.** Stimulating CB<sub>2</sub> receptors fails to affect fat sham intake. Effects of i.p. administration of JWH-015 on 30-min sham feeding of corn oil. Results are expressed as mean ± SEM; *n* = 5. Paired Student's *t* test, two-tailed, versus vehicle treatment.

**Table S1.** Sham feeding, irrespective of test diet, fails to alter levels of oleoylethanolamide (OEA) in the jejunum

| Food type    | Oleoylethanolamide, pmol/g |             |
|--------------|----------------------------|-------------|
|              | No diet                    | Diet        |
| Ensure       | 49.3 ± 2.1                 | 52.5 ± 3.1  |
| Fat          | 59.7 ± 4.8                 | 64.1 ± 12.1 |
| Sucrose      | 63.8 ± 6.5                 | 53.7 ± 2.1  |
| Protein      | 37.5 ± 4.8                 | 41.1 ± 4.2  |
| Fat-vagotomy | 36.2 ± 4.8                 | 29.1 ± 4.8  |

Effects of sham intake of Ensure, corn oil, sucrose, peptone, or corn oil in vagotomized animals, on jejunal OEA content. Results are expressed as mean ± SEM; *n* = 5–7 per condition. Unpaired Student's *t* tests, two-tailed, between no diet and diet conditions.
